# Supplementary material for: The effect of lipid metabolism regulator anthocyanins from Aronia melanocarpa on 3T3-L1 preadipocytes and C57BL/6 mice via activating AMPK signaling and gut microbiota
Source: Royal Society of Chemistry journal article supplement (doi:10.1039/d1fo00907a), 2021-01-01

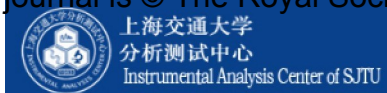

## Analysis Information

|                        |                                           |                                    |                                           |
|------------------------|-------------------------------------------|------------------------------------|-------------------------------------------|
| Item name:             | Yanbian U_ant_20201118_pro                | Analysis Method Item name:         | FL_Process method_MSe_pos_for anth        |
| Modified date:         | Nov 25, 2020 11:36:03 China Standard Time | Sample Set Created date:           | Nov 23, 2020 11:33:07 China Standard Time |
| Folder:                | Company/TCM/Method                        | Sample Set Instrument system name: | UPLC_PDA_VION                             |
| Sample Set Created by: | Li, xin                                   |                                    |                                           |

# BPI chromatography

Item name: blk  
Channel name: PDA 520@4.8

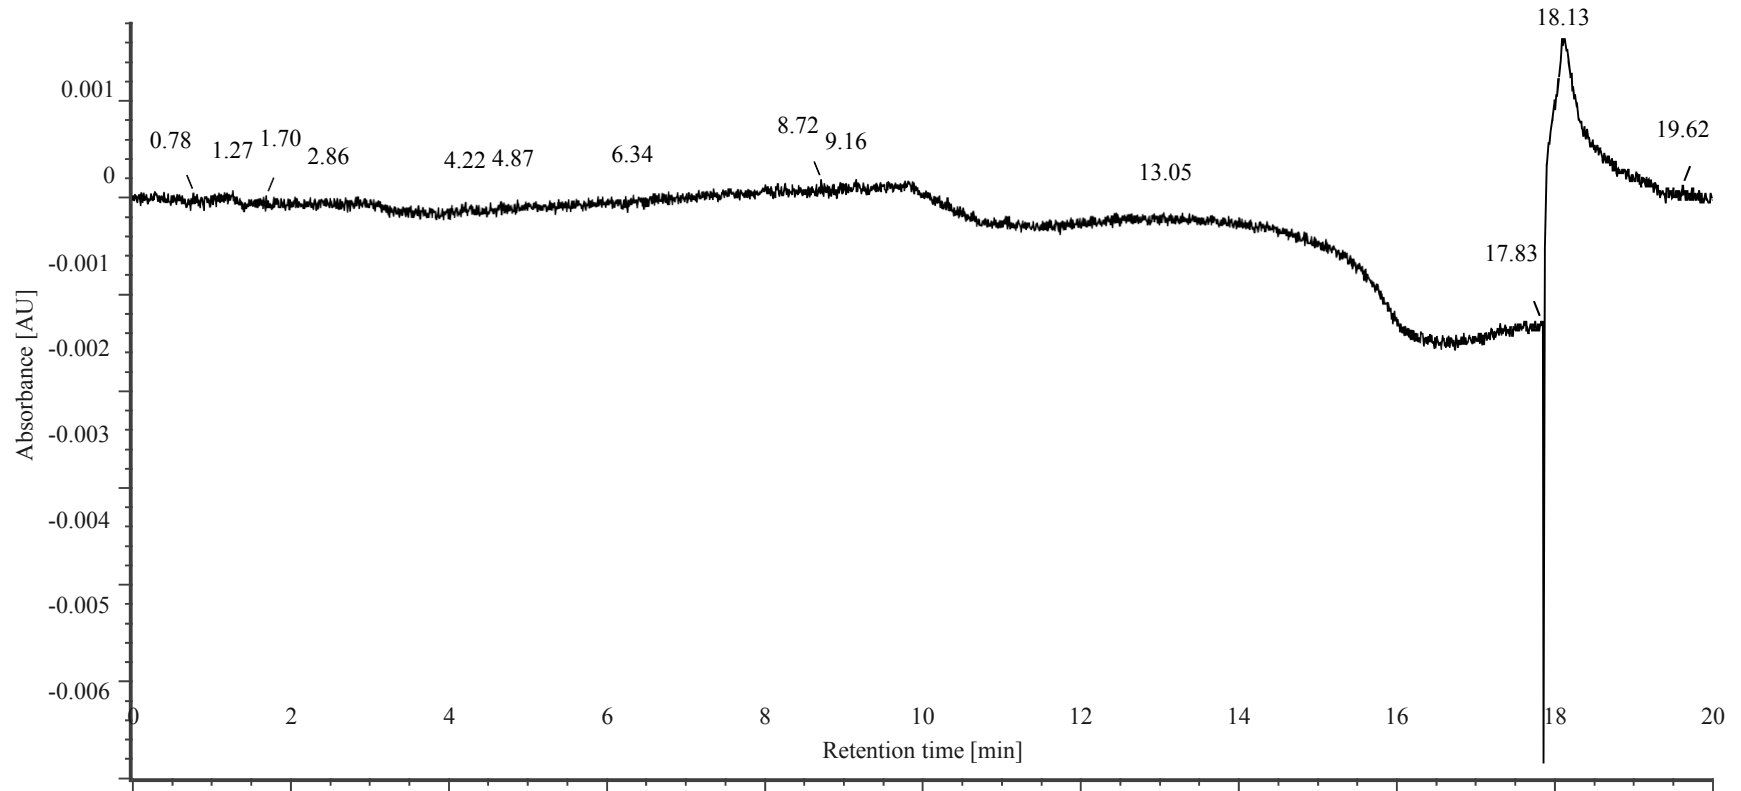

Item name: s1  
Channel name: PDA 520@4.8

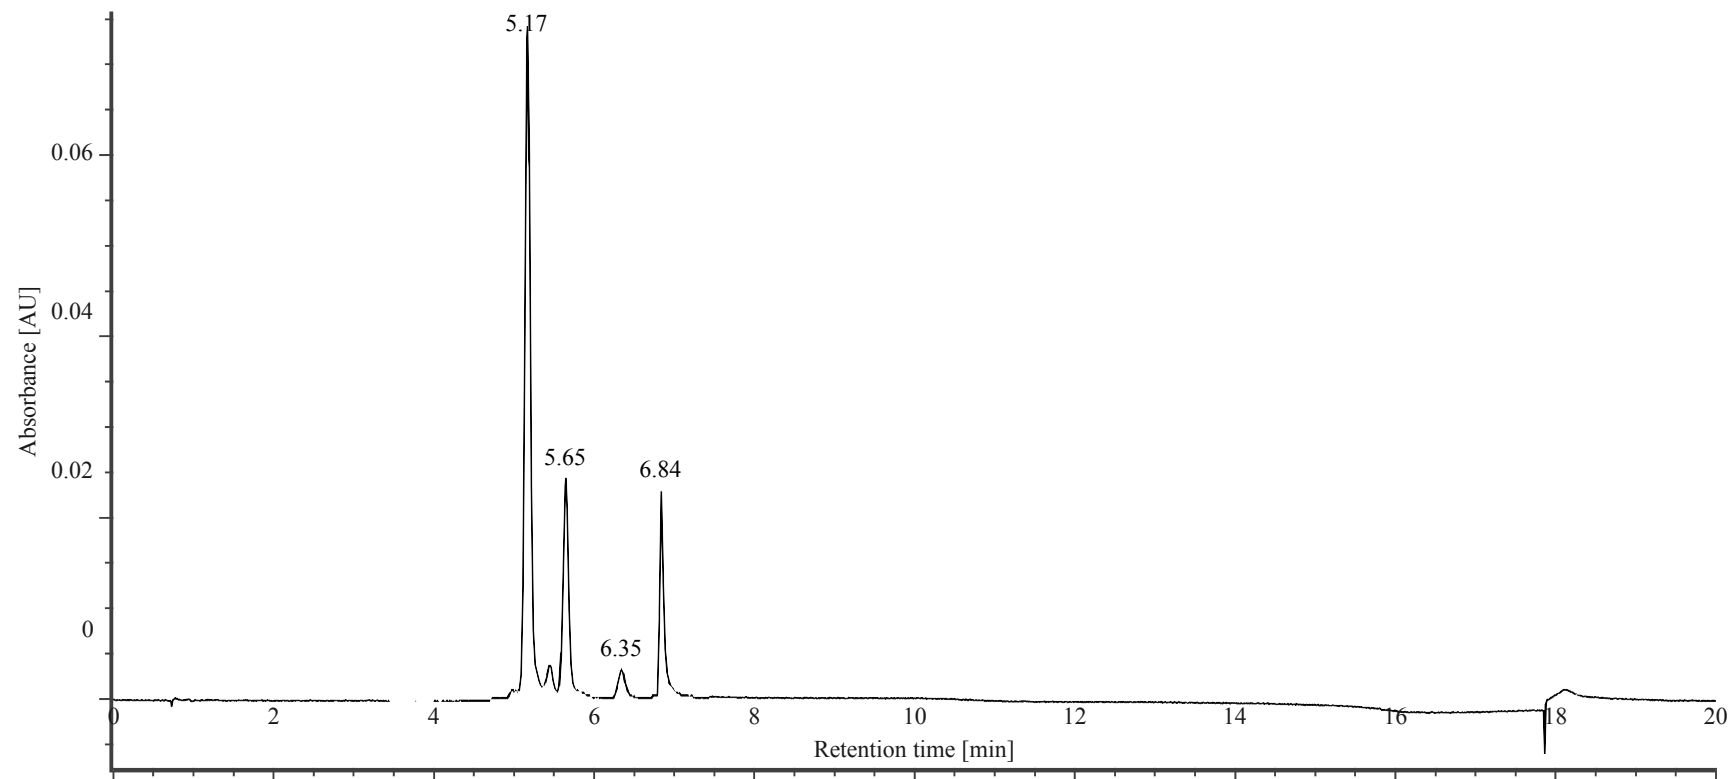

Item name: s2  
Channel name: PDA 520@4.8

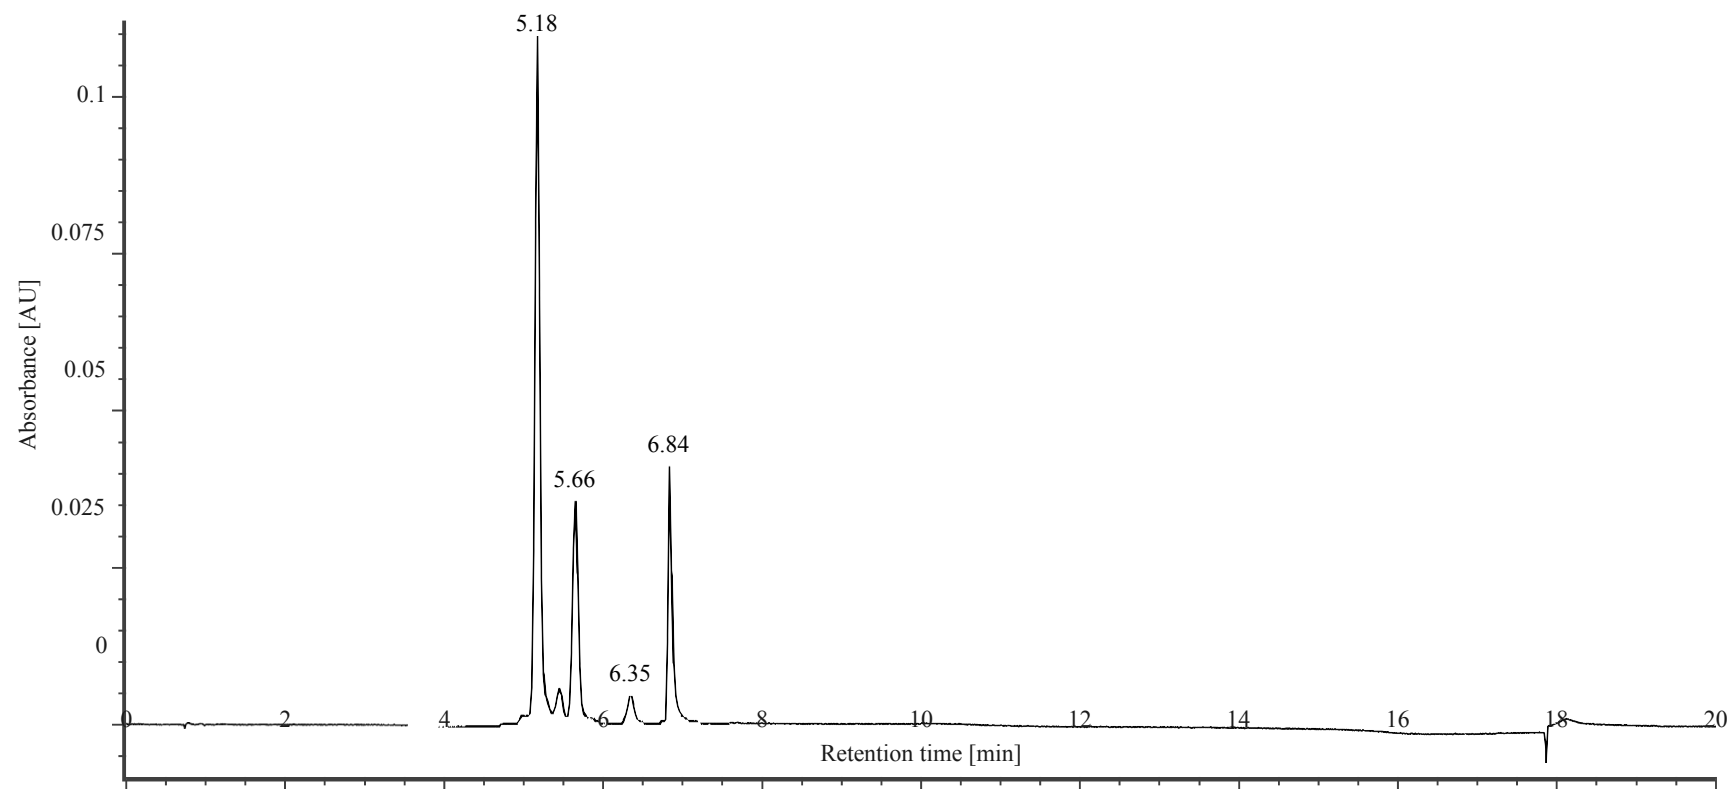

## Details for Identified Component

### Confirmed Component list

|   | Item name | Component name           | Label   | Formula                                         | RT   | Observed m/z | Adducts | Mass error (mDa) | Response |
|---|-----------|--------------------------|---------|-------------------------------------------------|------|--------------|---------|------------------|----------|
| 1 | s1        | Cyanidin 3-arabinoside   | confirm | C <sub>20</sub> H <sub>19</sub> O <sub>10</sub> | 5.68 | 419.0969     | -e      | -0.4             | 167946   |
| 2 | s1        | Cyanidin-3-O-galactoside | confirm | C <sub>21</sub> H <sub>21</sub> O <sub>11</sub> | 5.21 | 449.1074     | -e      | -0.4             | 444874   |
| 3 | s1        | Cyanidin-3-O-glucoside   | confirm | C <sub>21</sub> H <sub>21</sub> O <sub>11</sub> | 5.48 | 449.1074     | -e      | -0.4             | 28809    |

### Confirmed Component list

|   | Item name | Component name           | Label   | Formula                                         | RT   | Observed m/z | Adducts | Mass error (mDa) | Response |
|---|-----------|--------------------------|---------|-------------------------------------------------|------|--------------|---------|------------------|----------|
| 1 | s2        | Cyanidin 3-arabinoside   | confirm | C <sub>20</sub> H <sub>19</sub> O <sub>10</sub> | 5.70 | 419.0969     | -e      | -0.3             | 234642   |
| 2 | s2        | Cyanidin-3-O-galactoside | confirm | C <sub>21</sub> H <sub>21</sub> O <sub>11</sub> | 5.22 | 449.1075     | -e      | -0.3             | 611933   |
| 3 | s2        | Cyanidin-3-O-glucoside   | confirm | C <sub>21</sub> H <sub>21</sub> O <sub>11</sub> | 5.49 | 449.1076     | -e      | -0.2             | 40274    |

## Details for Identified Component

Item name: s1

Channel name: Cyanidin-3-O-galactoside [-e] : Cyanidin-3-O-glucoside [-e] :(25.8 PPM)  
449.1074

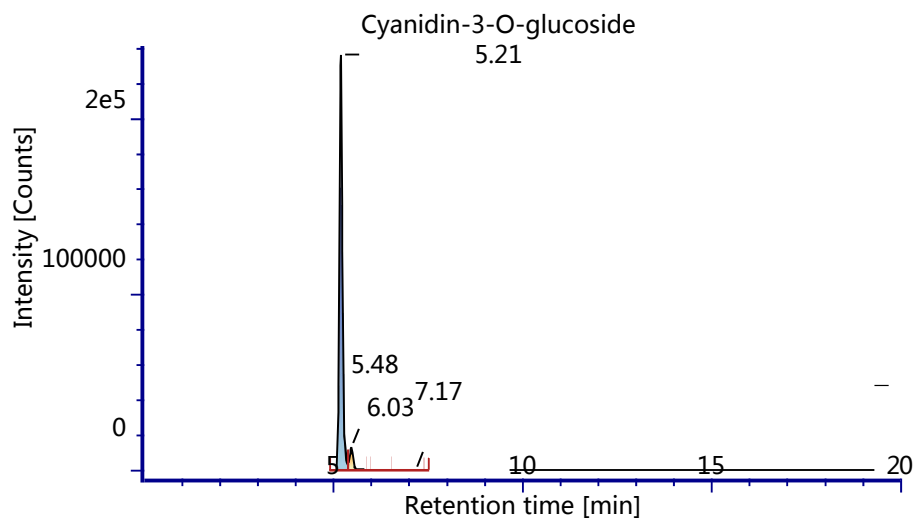

Item name: s1

Component name: Cyanidin-3-O-galactoside

Channel name: Low energy : Time  
5.2082 +/- 0.0327 minutes

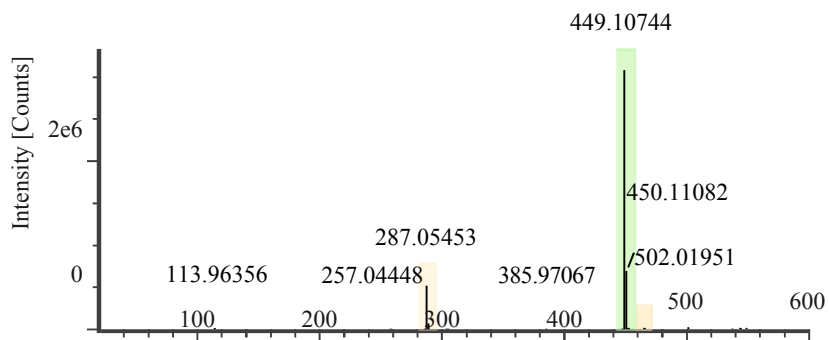

Item name: s1

Component name: Cyanidin-3-O-galactoside

Channel name: High energy : Time  
5.2082 +/- 0.0327 minutes

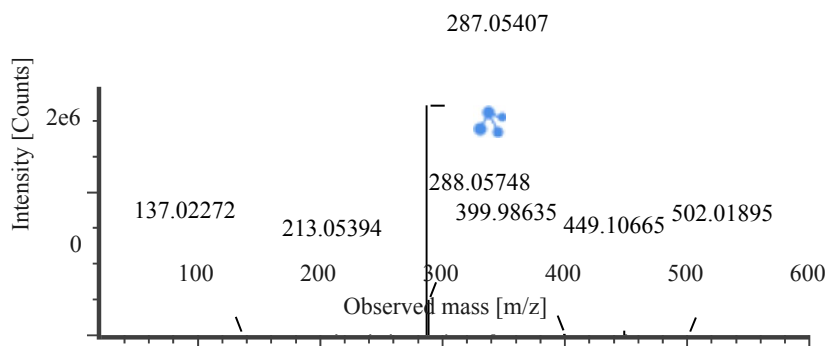

Item name: s1  
Channel name: Cyanidin-3-O-galactoside [-e] : Cyanidin-3-O-glucoside [-e] :(25.8 PPM)  
449.1074

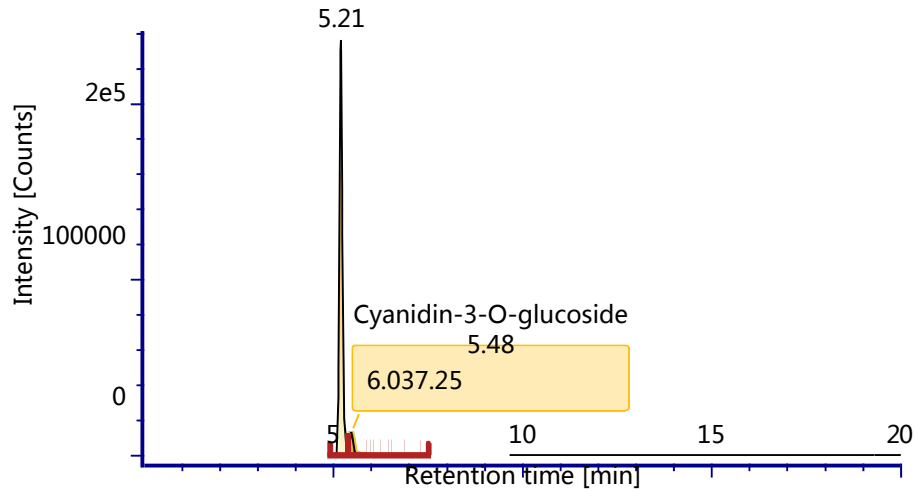

Item name: s1  
Component name: Cyanidin-3-O-glucoside

Channel name: Low energy : Time  
5.4820 +/- 0.0327 minutes

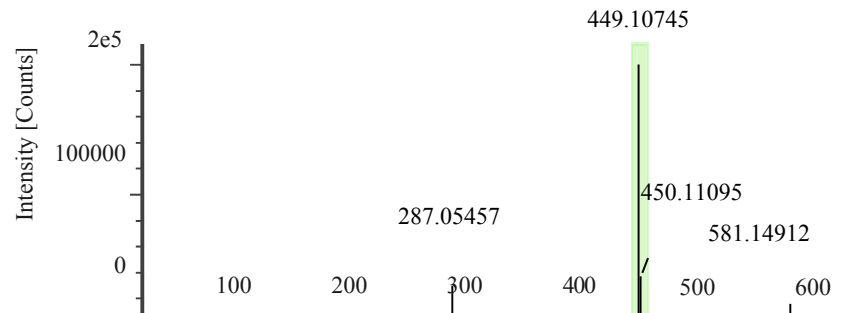

Item name: s1  
Component name: Cyanidin-3-O-glucoside

Channel name: High energy : Time  
5.4820 +/- 0.0327 minutes

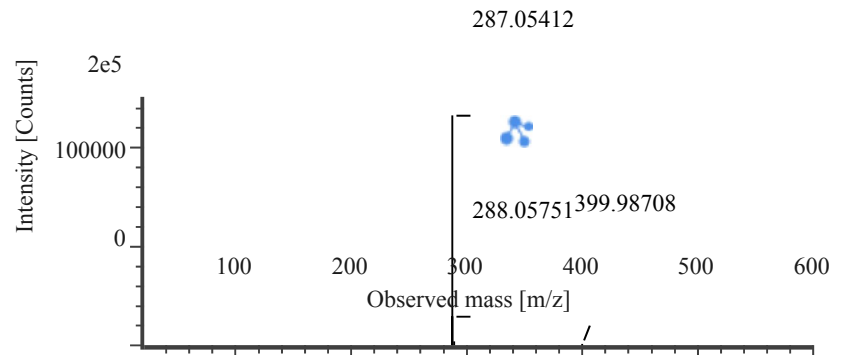

Item name: s1

Channel name: Cyanidin 3-arabinoside [-e] : (25.8 PPM) 419.0969

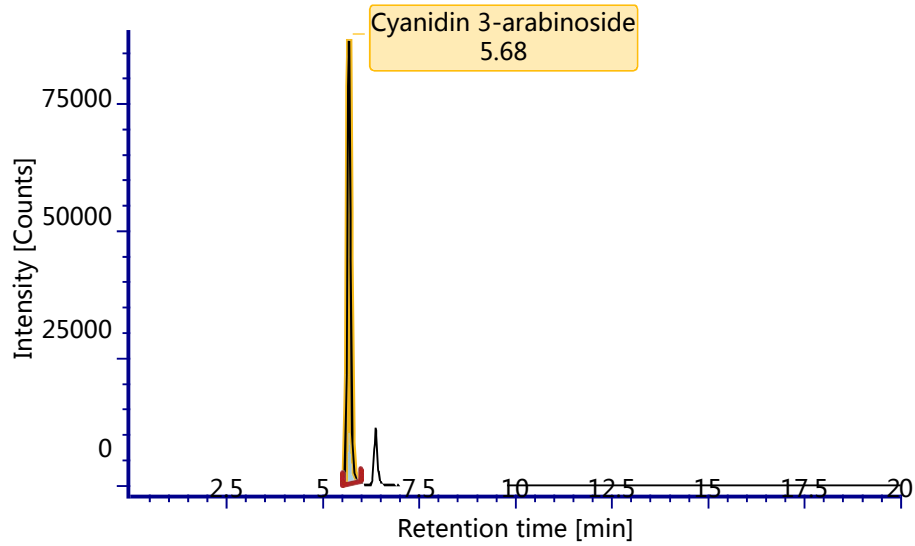

Item name: s1  
Component name: Cyanidin 3-arabinoside

Channel name: Low energy : Time  
5.6844 +/- 0.0327 minutes

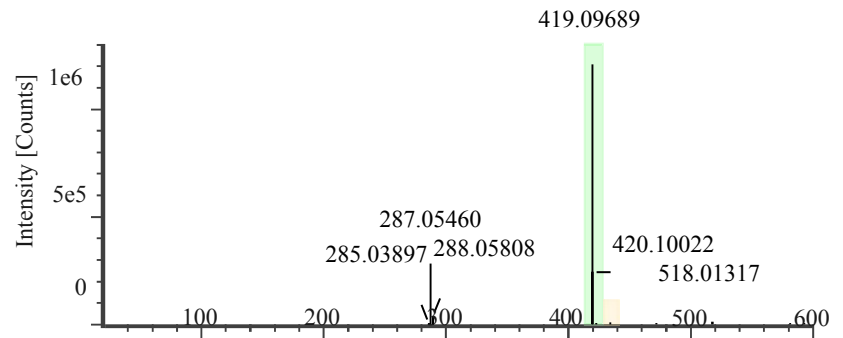

Item name: s1  
Component name: Cyanidin 3-arabinoside

Channel name: High energy : Time  
5.6844 +/- 0.0327 minutes

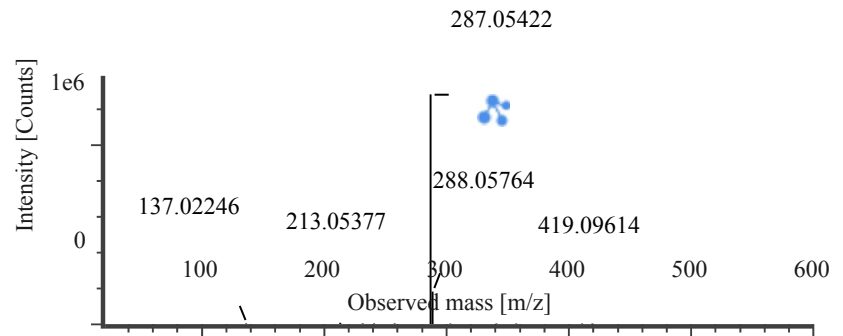



Item name: s2

Channel name: Cyanidin-3-O-galactoside [-e] : Cyanidin-3-O-glucoside [-e] :(25.8 PPM)  
449.1075

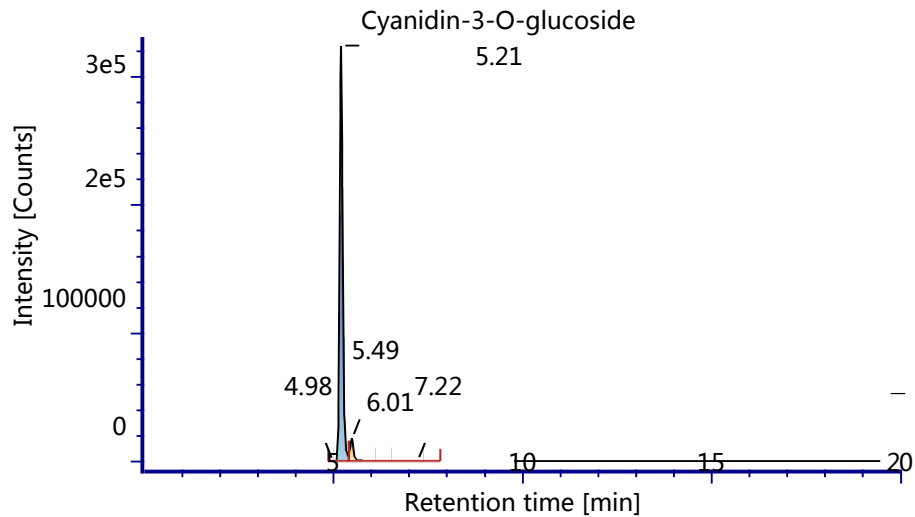

Item name: s2

Component name: Cyanidin-3-O-galactoside

Channel name: Low energy : Time  
5.2164 +/- 0.0286 minutes

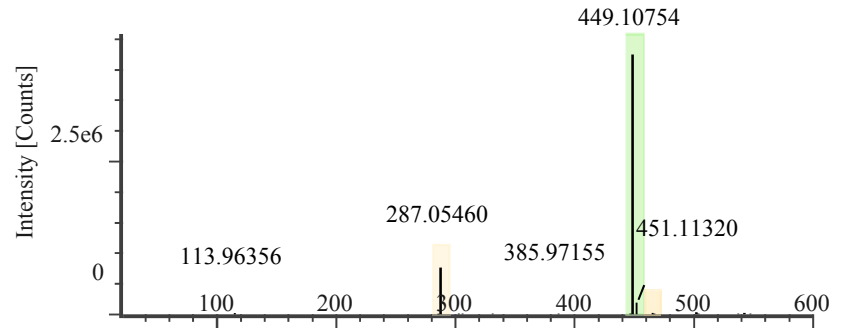

Item name: s2

Component name: Cyanidin-3-O-galactoside

Channel name: High energy : Time  
5.2164 +/- 0.0286 minutes

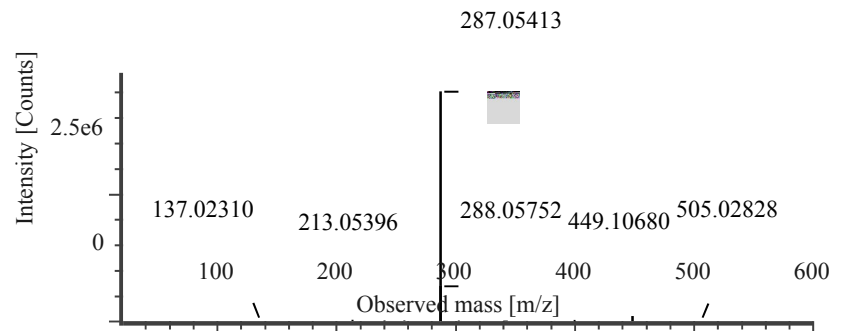

Item name: s2

Channel name: Cyanidin-3-O-galactoside [-e] : Cyanidin-3-O-glucoside [-e] :(25.8 PPM)  
449.1076

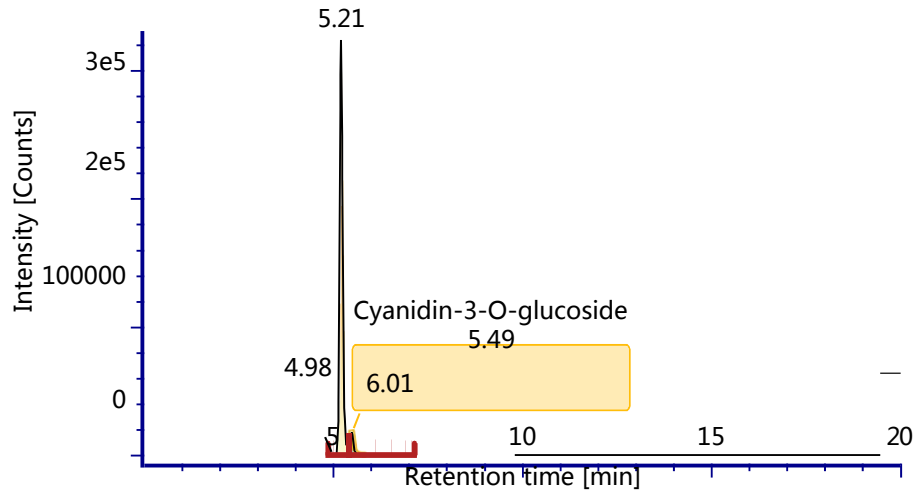

Item name: s2

Component name: Cyanidin-3-O-glucoside

Channel name: Low energy : Time  
5.4927 +/- 0.0286 minutes

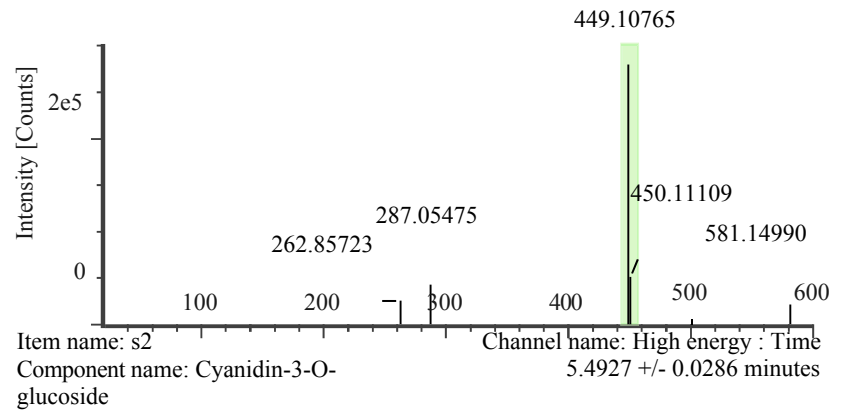

Item name: s2

Component name: Cyanidin-3-O-glucoside

Channel name: High energy : Time  
5.4927 +/- 0.0286 minutes

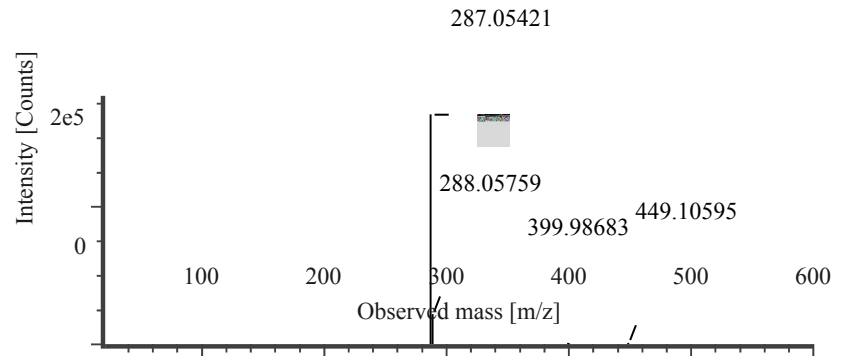

Item name: s2

Channel name: Cyanidin 3-arabinoside [-e] : (25.8 PPM) 419.0969

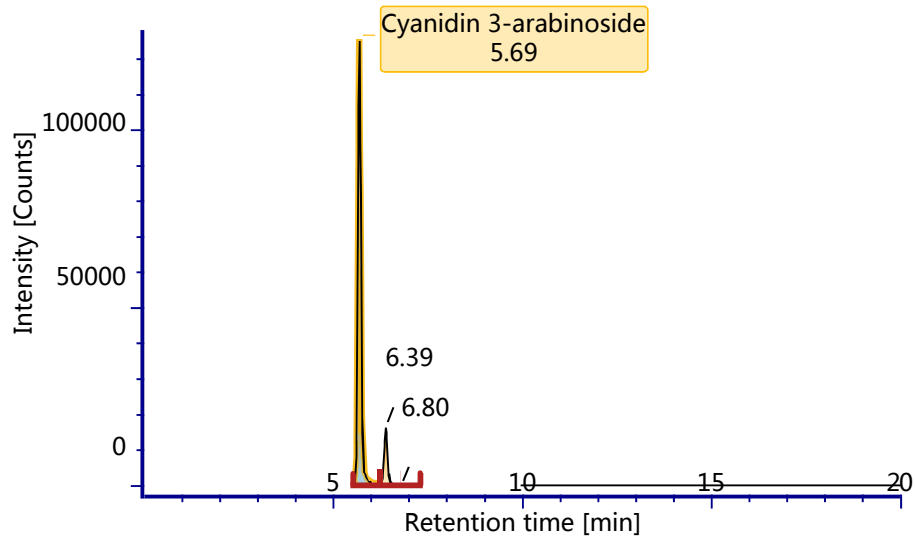

Item name: s2

Component name: Cyanidin 3-arabinoside

Channel name: Low energy : Time  
5.6951 +/- 0.0286 minutes

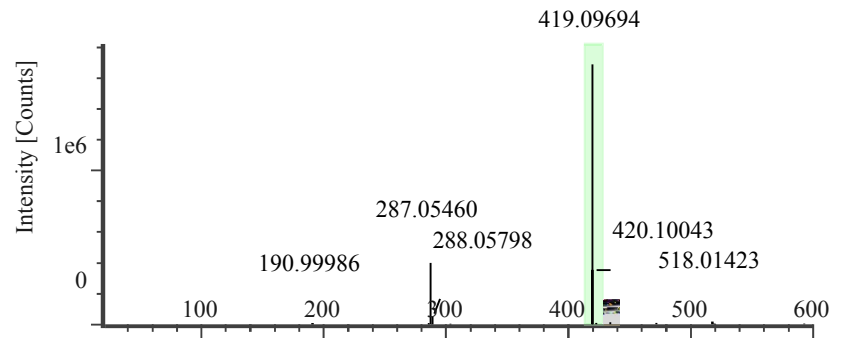

Item name: s2

Component name: Cyanidin 3-arabinoside

Channel name: High energy : Time  
5.6951 +/- 0.0286 minutes

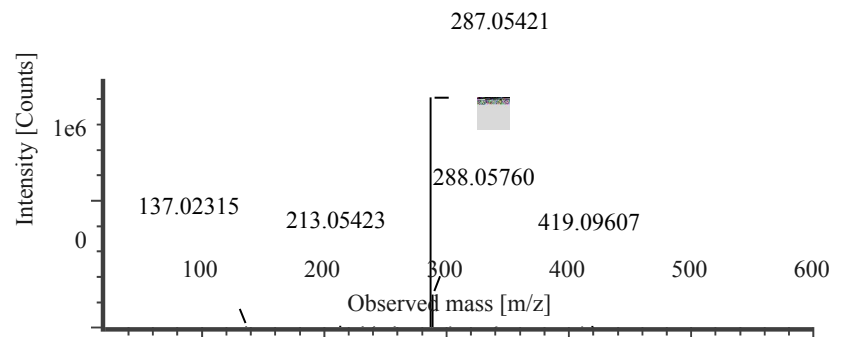

Supplement: d1fo00907a2.pdf [file d1fo00907a2.pdf]
