# Supplementary material for: The effect of lipid metabolism regulator anthocyanins from Aronia melanocarpa on 3T3-L1 preadipocytes and C57BL/6 mice via activating AMPK signaling and gut microbiota
Source: Royal Society of Chemistry journal article supplement (doi:10.1039/d1fo00907a), 2021-01-01
Supplement: d1fo00907a1.pdf [file d1fo00907a1.pdf]

Table S1.

The nutrients of low-fat feed and high-fat feed.

| Product                             | D12450B        |             | D12451        |             |
|-------------------------------------|----------------|-------------|---------------|-------------|
|                                     | g%             | kcal%       | g%            | kcal%       |
| <b>Protein</b>                      | 19             | 20          | 24            | 20          |
| <b>Carbohydrate</b>                 | 67             | 70          | 41            | 35          |
| <b>Fat</b>                          | 4              | 10          | 24            | 45          |
| <b>Total kcal/gm</b>                | 3.8            | 100         | 4.7           | 100         |
| Ingredient                          | g              | kcal        | g             | kcal        |
| Casein,80 Mesh                      | 200            | 800         | 200           | 800         |
| L-Cystine                           | 3              | 12          | 3             | 12          |
| Corn Starch                         | 315            | 1260        | 72.8          | 291         |
| Maltodextrin 10                     | 35             | 140         | 100           | 400         |
| Sucrose                             | 350            | 1400        | 172.8         | 691         |
| Cellulose, BW200                    | 50             | 0           | 50            | 0           |
| Soybean Oil                         | 25             | 225         | 25            | 225         |
| Lard                                | 20             | 180         | 177.5         | 1598        |
| Mineral Mix S10026                  | 10             | 0           | 10            | 0           |
| DiCalcium Phosphate                 | 13             | 0           | 13            | 0           |
| Calcium Carbonate                   | 5.5            | 0           | 5.5           | 0           |
| Potassium Citrate,1H <sub>2</sub> O | 16.5           | 0           | 16.5          | 0           |
| Vitamin Mix V10001                  | 10             | 40          | 10            | 40          |
| Choline Bitartrate                  | 2              | 0           | 2             | 0           |
| FD&C Yellow Dye #5                  | 0.05           | 0           | 0             | 0           |
| FD&C Red Dye #40                    | 0              | 0           | 0.05          | 0           |
| FD&C Blue Dye #1                    | 0              | 0           | 0             | 0           |
| <b>Total</b>                        | <b>1055.05</b> | <b>4057</b> | <b>858.15</b> | <b>4057</b> |

Table S2.

## Oligonucleotides used in the quantitative real-time PCR analysis

| Table 2-7 Primer sequence |         |                                  |
|---------------------------|---------|----------------------------------|
| target genes              |         | sequences                        |
| $\beta$ -action           | forward | 5'-CATCCGTAAAGACCTCTATGCCAAC-3'  |
|                           | reverse | 5'-ATGGAGCCACCGATCCACA-3'        |
| C/EBP $\alpha$            | forward | 5'-ACCGGGTTTCGGGACTTGA-3'        |
|                           | reverse | 5'-CCCGCAGGAACATCTTTAAGTGA-3'    |
| PPAR $\gamma$             | forward | 5'-AGACCACTCGCATTCTTT-3'         |
|                           | reverse | 5'-CCACAGACTCGGCACTCAAT-3'       |
| ACC                       | forward | 5'-AGTGATGGTGGCCTGCTCTTG-3'      |
|                           | reverse | 5'-AGCAGACGGTGAGCGCATT-3'        |
| SREBP1-c                  | forward | 5'-CCGAGATGTGCGAACTGGA-3'        |
|                           | reverse | 5'-GAAGTCACTGTCTTGGTTGTTGATG-3'  |
| HSL                       | forward | 5'-TCCTGGAACTAAGTGGACGCAAG-3'    |
|                           | reverse | 5'-CAGACACACTCCTGCGCATAGAC-3'    |
| FAS                       | forward | 5'-TGCTGTTGGAAGTCAGCTATGAA-3'    |
|                           | reverse | 5'-GATGCCTCTGAACCACTCACAC-3'     |
| FABP4                     | forward | 5'-TGGGAACCTGGAAGCTTGTCTC-3'     |
|                           | reverse | 5'-GAATTCCACGCCAGTTTGA-3'        |
| Perilipin                 | forward | 5'-GTCAATGAACAAGGGCCCAAC-3'      |
|                           | reverse | 5'-CACAGGCAGCTGCAGAACTCTC-3'     |
| Adiponectin               | forward | 5'-TTCTGTCTGTACGATTGTCAGTGGA-3'  |
|                           | reverse | 5'-GGCATGACTGGGCAGGATTA-3'       |
| Leptin                    | forward | 5'-CTATGCCACCTTGGTCACCT-3'       |
|                           | reverse | 5'-ACCAAACCAAGCATTTTTGC-3'       |
| IL-6                      | forward | 5'-GCTACCAAACCTGGATATAATCAGGA-3' |
|                           | reverse | 5'-CCAGGTAGCTATGGTACTCCAGAA-3'   |
| MCP-1                     | forward | 5'-ATTGGGATCATCTTGCTGGT-3'       |
|                           | reverse | 5'-CCTGCTGTTACAGTTGCC-3'         |
| TLR                       | forward | 5'-TGGCATGGCTTACACCACC-3'        |
|                           | reverse | 5'-GAGGCCAATTTTGTCTCCACA-3'      |

Table S3. Details for Identified Component.

| <b>Peak</b> | <b>Component name</b>    | <b>Label</b> | <b>Formula</b>                                  | <b>RT</b> | <b>Observed m/z Adducts</b> | <b>Mass error (mDa)</b> | <b>Response</b> |
|-------------|--------------------------|--------------|-------------------------------------------------|-----------|-----------------------------|-------------------------|-----------------|
| 1           | Cyanidin 3-arabinoside   | confirm      | C <sub>20</sub> H <sub>19</sub> O <sub>10</sub> | 5.68      | 419.0969 -e                 | -0.4                    | 167946          |
| 2           | Cyanidin-3-O-galactoside | confirm      | C <sub>21</sub> H <sub>21</sub> O <sub>11</sub> | 5.21      | 449.1074 -e                 | -0.4                    | 444874          |
| 3           | Cyanidin-3-O-glucoside   | confirm      | C <sub>21</sub> H <sub>21</sub> O <sub>11</sub> | 5.48      | 449.1074 -e                 | -0.4                    | 28809           |

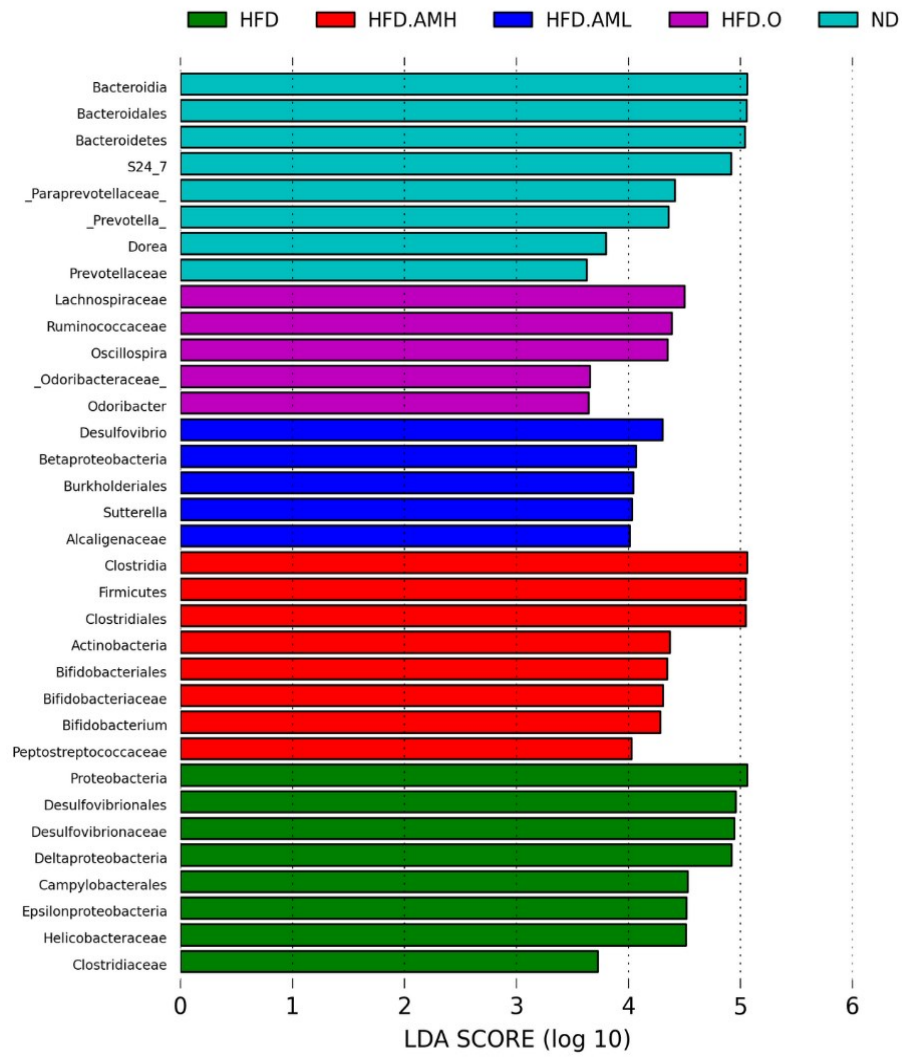

Fig. S1 LDA SCORE.

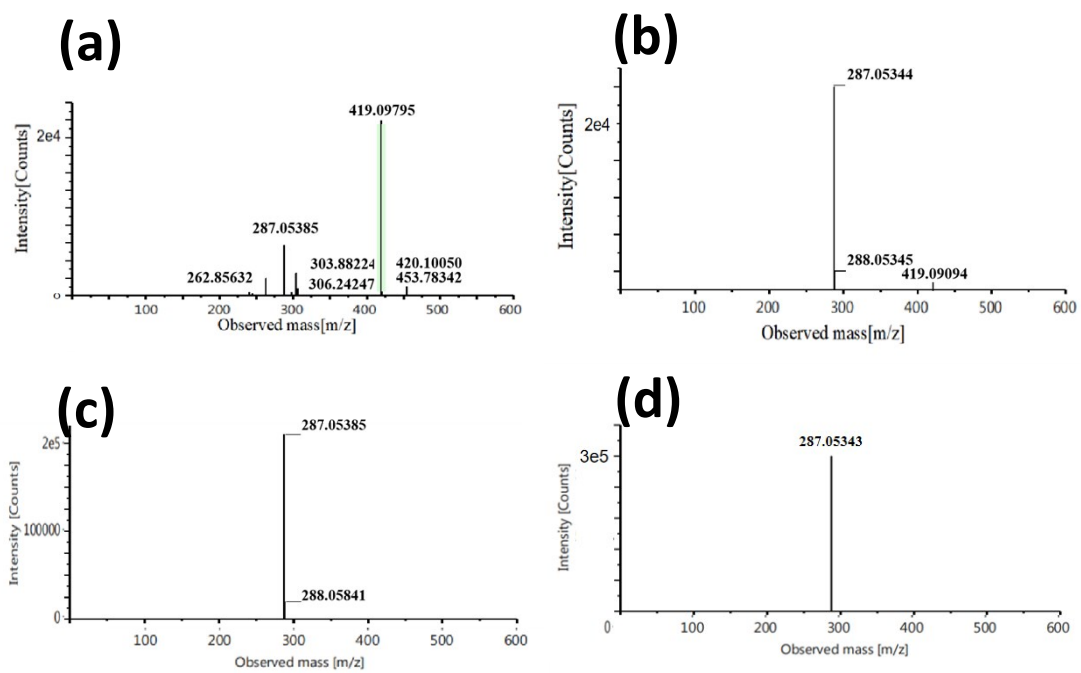

Fig. S2 (a) MS and (b) MS<sup>2</sup> data of Peak 4; (c) MS and (d) MS<sup>2</sup> data of Peak 5.

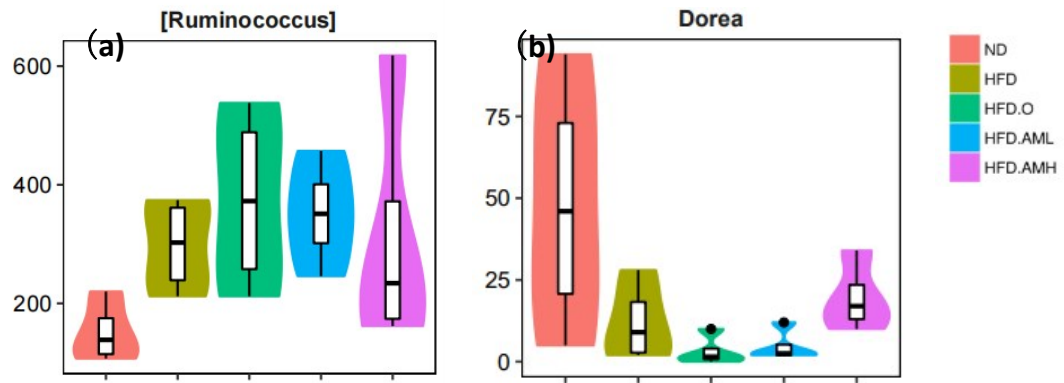

Fig. S3 The relative abundance of distinct taxa in the genus level.
