# Supplementary figures and images for: The effect of lipid metabolism regulator anthocyanins from Aronia melanocarpa on 3T3-L1 preadipocytes and C57BL/6 mice via activating AMPK signaling and gut microbiota
Source: Royal Society of Chemistry journal article supplement (doi:10.1039/d1fo00907a), 2021-01-01

ACC

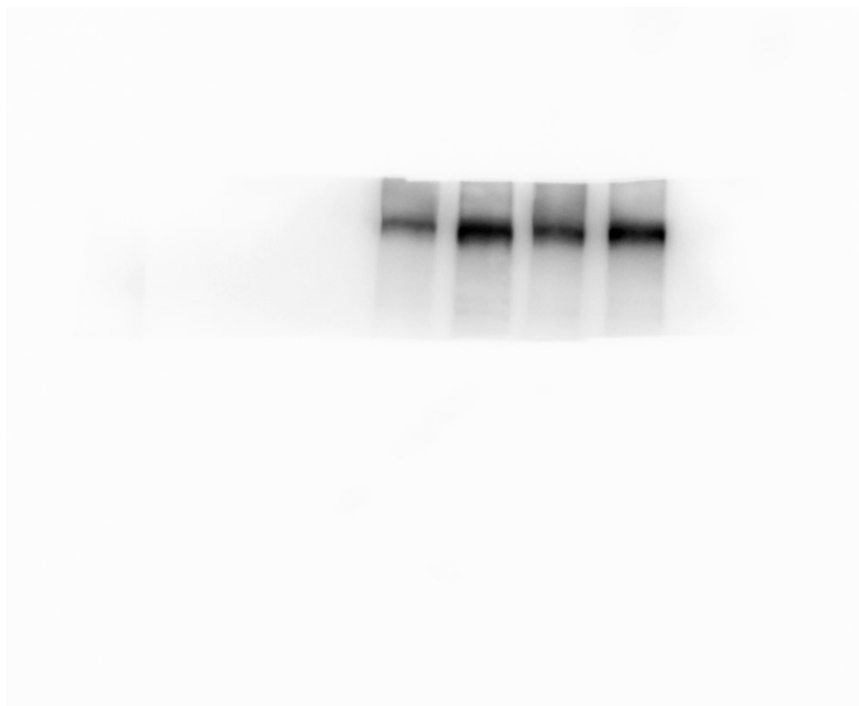

P-ACC

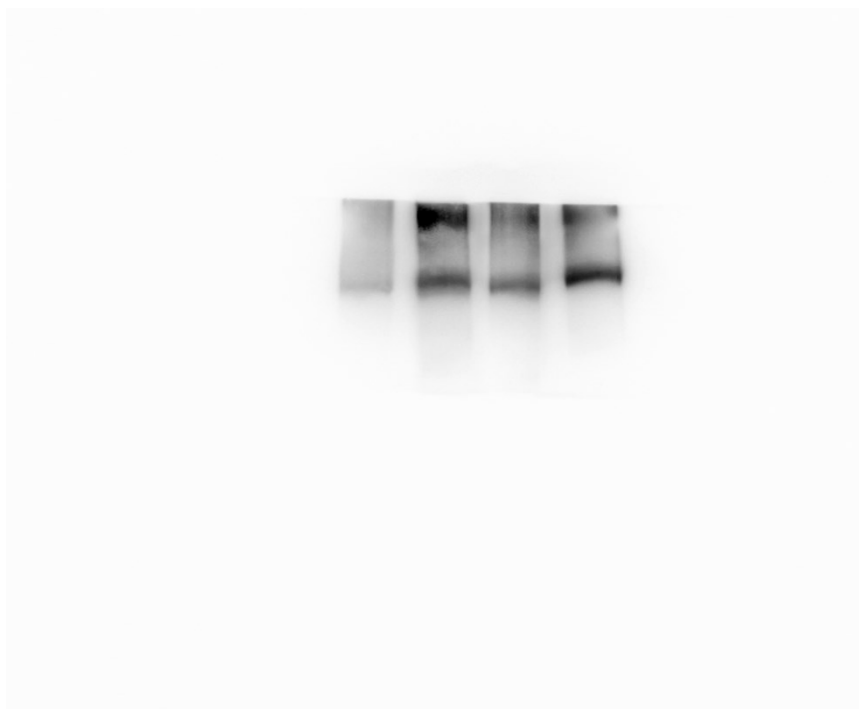

AMPK $\alpha$

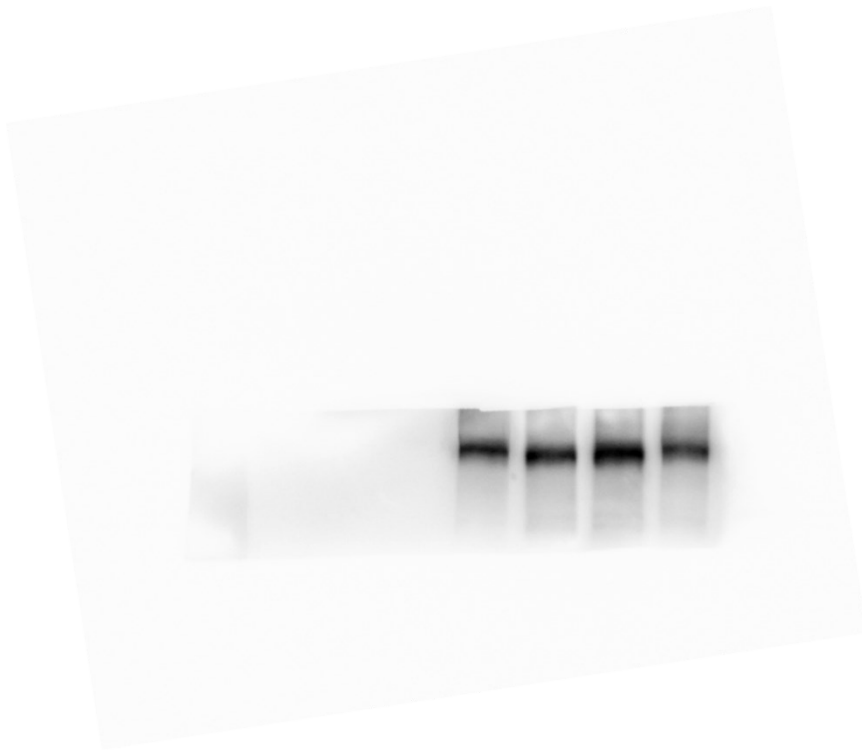

P-AMPK $\alpha$

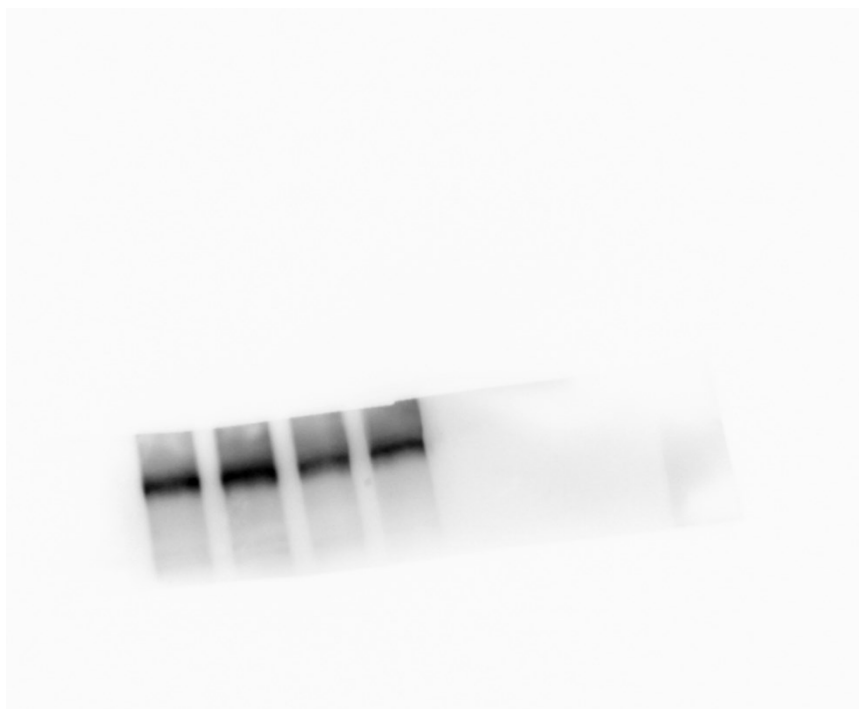

PPAR $\gamma$ -1、PPAR $\gamma$ -2

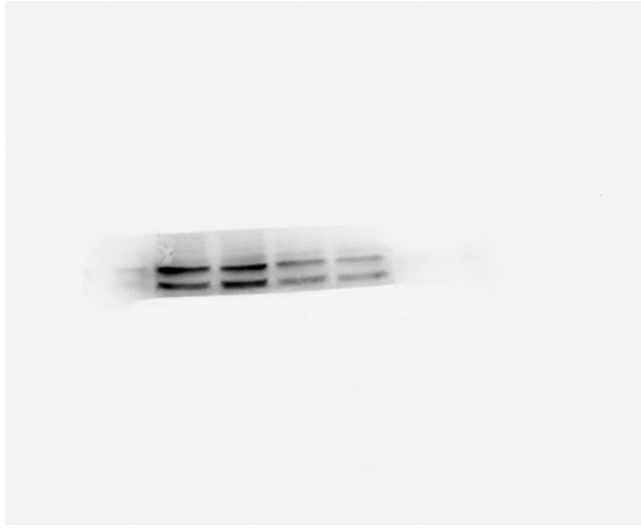

C/EBP

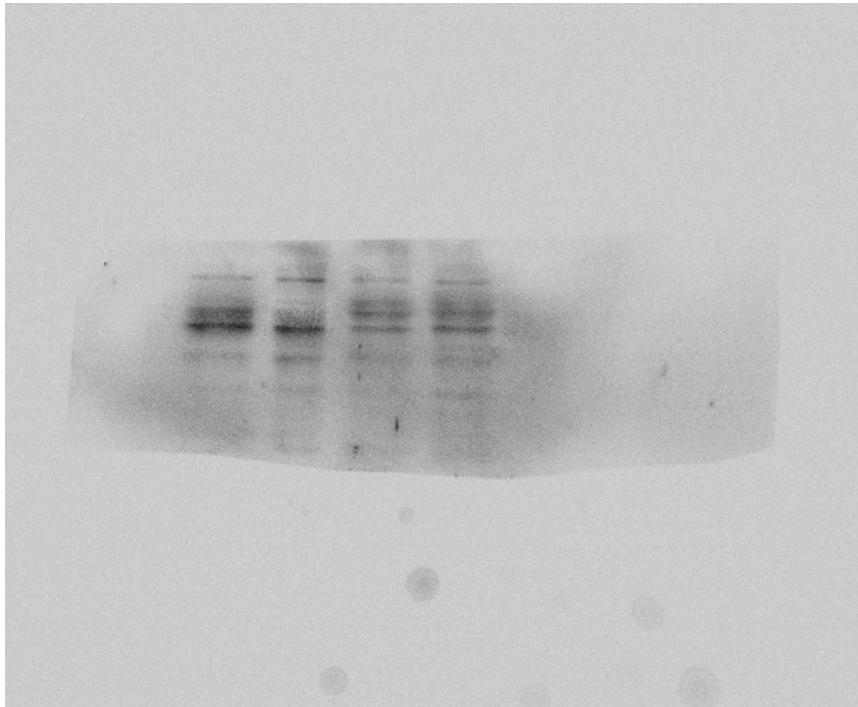

$\beta$ -actin

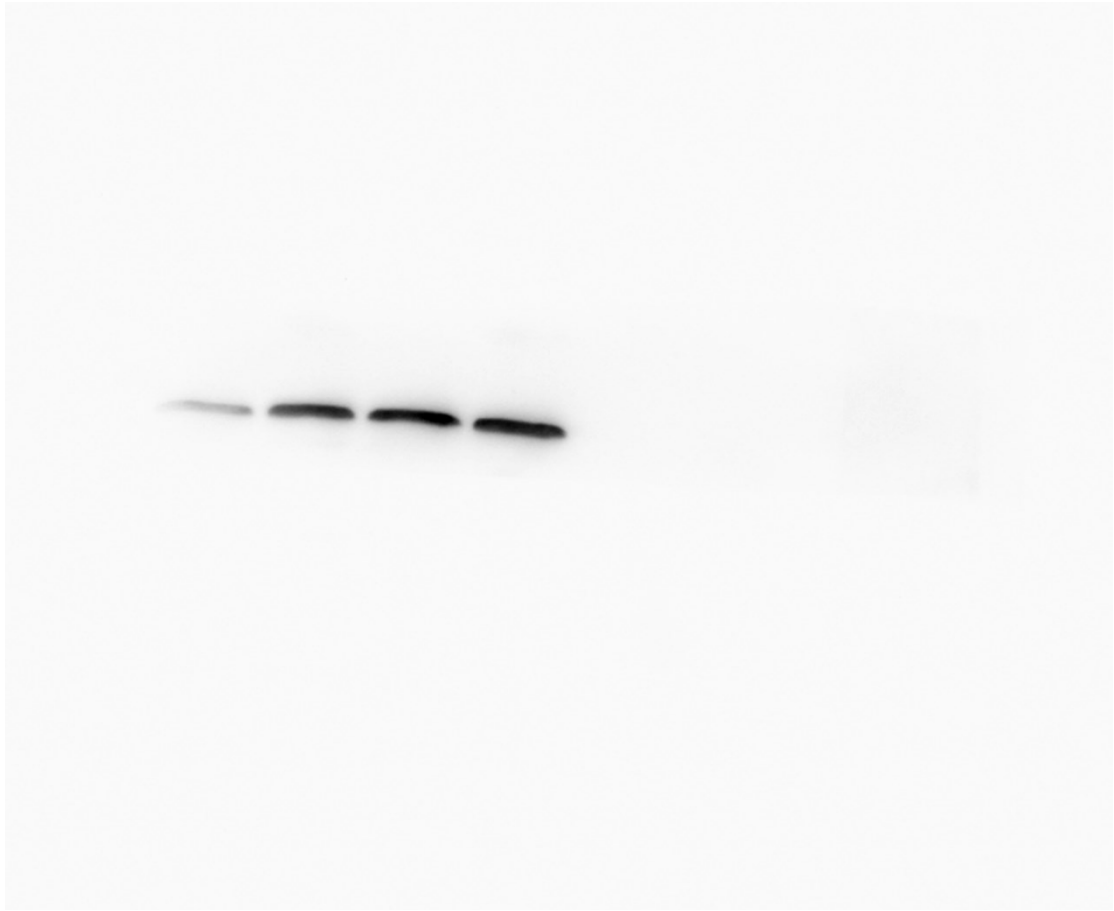

Supplement: d1fo00907a3.pdf [file d1fo00907a3.pdf]
